# Supplementary material
Source: Springer Nature journal article supplement (https://www.springermedizin.de/resource/supplementary/12888_2013_1604_MOESM3_ESM.pdf/9480954)
Supplement: MOESM3 [file 9480954]

Relevant articles using study selection keywords,  
reference lists and manual search of journals:

Animal Studies N= 41

Studies not relevant to search (theoretical concepts,  
no substance misuse, no prenatal exposure, foetal  
outcomes, biochemical analysis, treatment, health

Conceptual/theoretical reviews rather than empirical  
studies: N=89

Studies examined for inclusion/exclusion criteria  
after using titles and abstracts: N= 200

- Not opioid specific N=74
- Letters and conference abstracts N=30
- Hepatitis/HIV studies N=19
- Others N= 6
- Articles could not be located N=6

Studies examined for inclusion/exclusion criteria  
after using sourced articles N= 65

Studies examining neurobehavioral  
outcomes N= 8

- 1 study measured motor behavior skills
- 2 studies had opioid exposed cohort <15

Studies examining neurobehavioral outcomes of intrauterine opioid exposed cohorts N=5\*

- Infants N=4
- Pre-School Children N= 3
- School Children N= 1

\*2 studies tested same cohort during infancy and pre-school periods and 1 study tested cohort during pre-school and school
